# Supplementary material for: Nucleation-mode particle pool and large increases in N cn and N ccn observed over the northwestern Pacific Ocean in the spring of 2014
Source: Copernicus journal article supplement (doi:10.5194/acp-19-8845-2019), 2019-07-11
Supplement: Supplementary file 1 [file acp-19-8845-2019-supplement.pdf]

Supplement of Atmos. Chem. Phys., 19, 8845–8861, 2019  
<https://doi.org/10.5194/acp-19-8845-2019-supplement>  
© Author(s) 2019. This work is distributed under  
the Creative Commons Attribution 4.0 License.

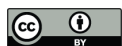

*Supplement of*

## **Nucleation-mode particle pool and large increases in $N_{cn}$ and $N_{ccn}$ observed over the northwestern Pacific Ocean in the spring of 2014**

**Juntao Wang et al.**

*Correspondence to:* Yang Gao (yanggao@ouc.edu.cn) and Xiaohong Yao (xhyao@ouc.edu.cn)

The copyright of individual parts of the supplement might differ from the CC BY 4.0 License.

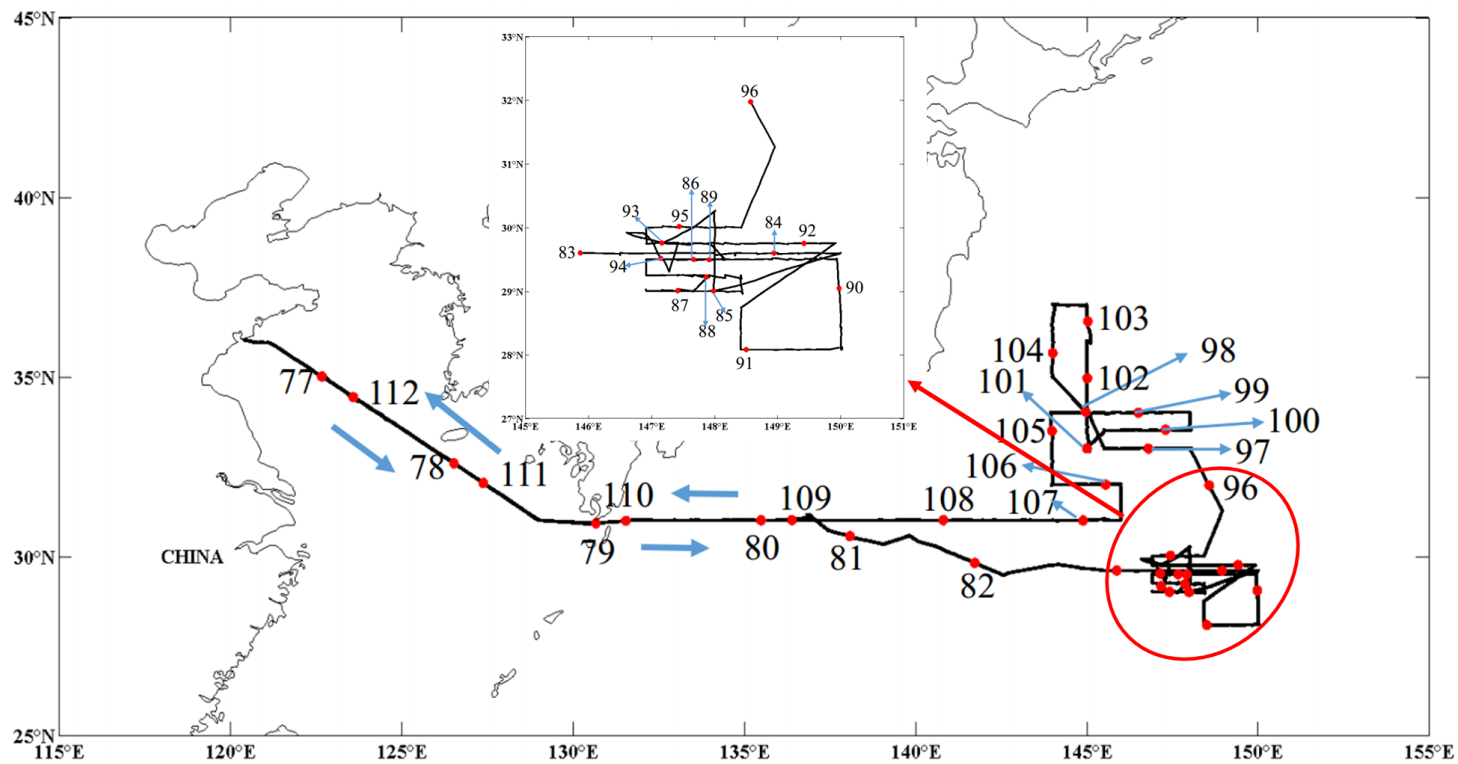

**Figure S1** Cruise track of R/V *Dong Fang Hong 2* during DOY 77- 112 in 2014. Days of year are shown in corresponding position.

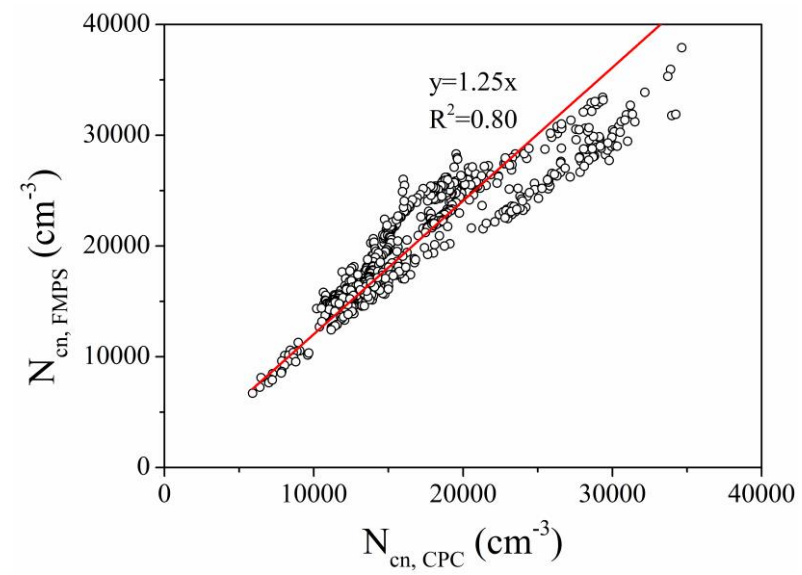

**Figure S2** Comparison of  $N_{cn}$  measured by FMPS and CPC before the campaign in 2014.

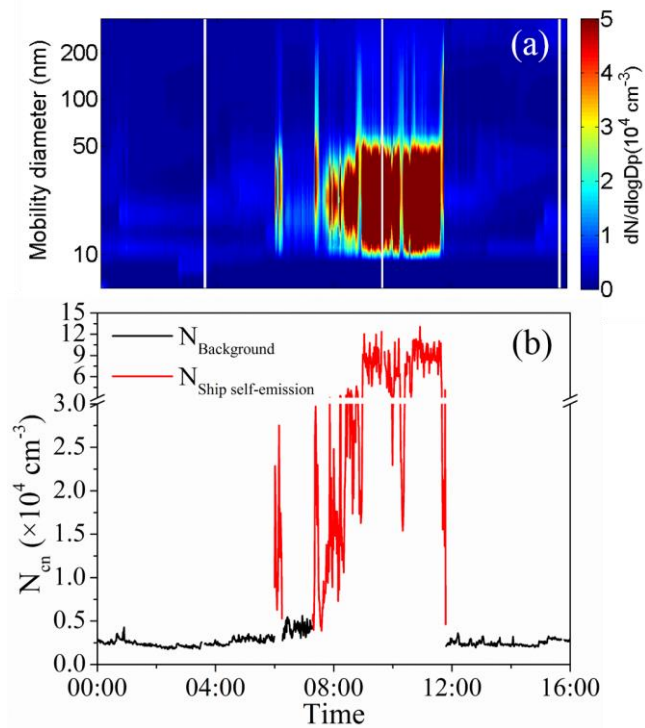

**Figure S3** An example to screen out the signals from ship self-emissions (a: high particle number concentration signals in dark red suffer from the large interference of ship self-emissions; particle number size distributions show a constant dominant mode at  $22 \pm 2$  nm; b: red spikes are the signals mainly reflect the contribution from ship-emissions and the black baseline reflects the signals of marine background aerosols).

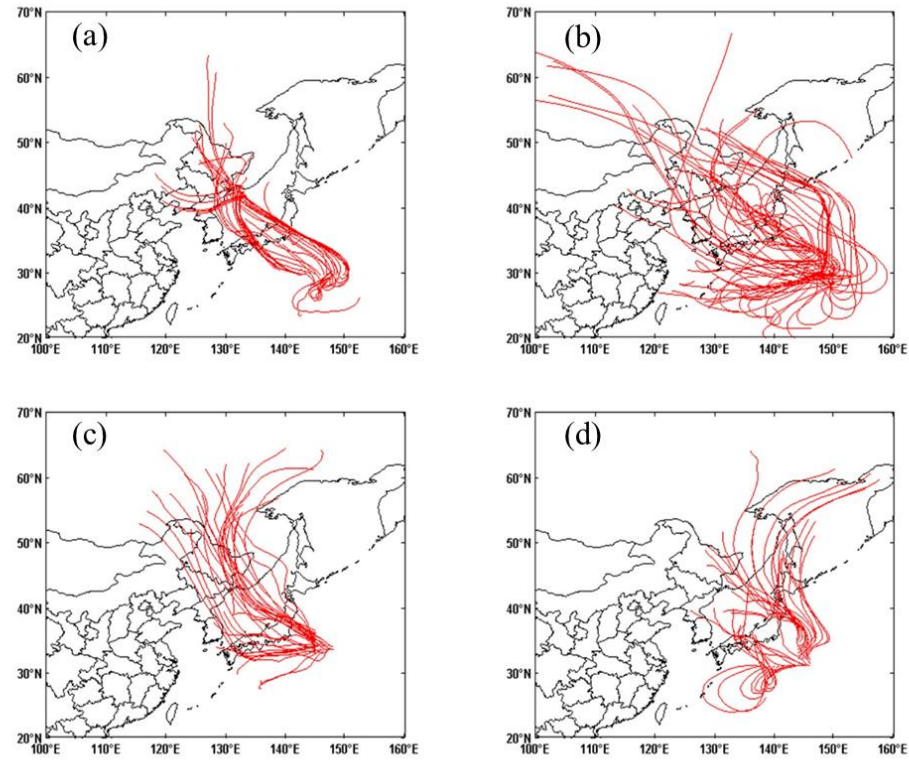

**Figure S4** 72-hour air mass backward trajectories over the NWPO at 1000 m for Period 1 (a), Period 2 (b), Period 3 (c), and Period 4 (d).

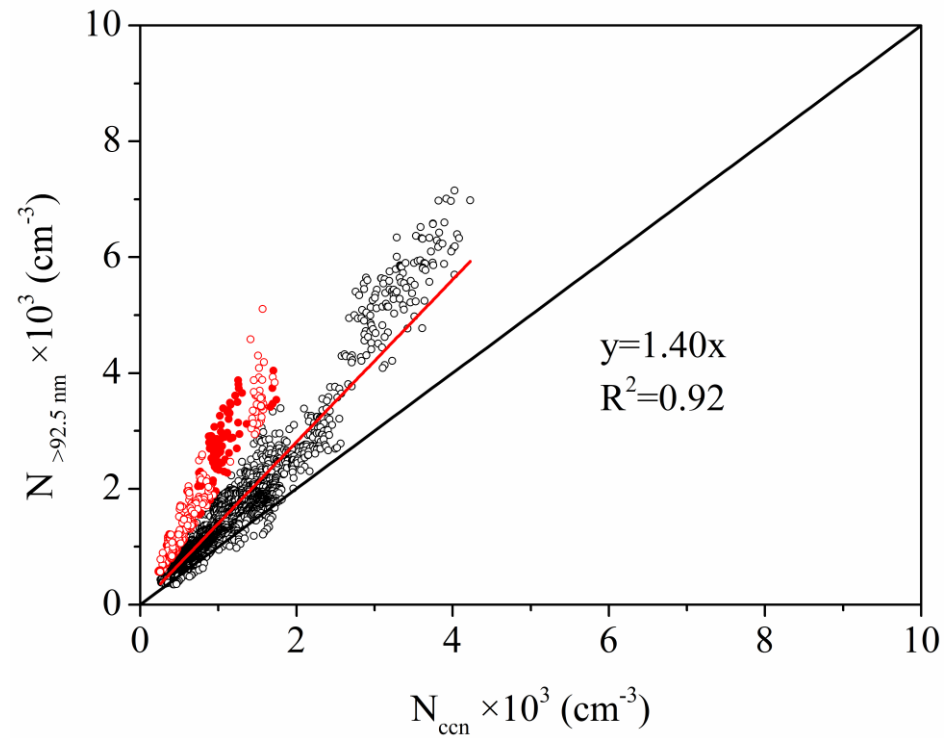

**Figure S5** Scatterplots of  $N_{\text{ccn}}$  at SS of 0.2% versus  $N_{>92.5 \text{ nm}}$ . (Biomass burning aerosol and dust aerosol are shown in full red cycles with empty red cycles representing suspected either biomass burning or dust aerosol; the black line represents the 1:1 relationship, and the red line shows the best fit using the data shown as empty black cycles.)

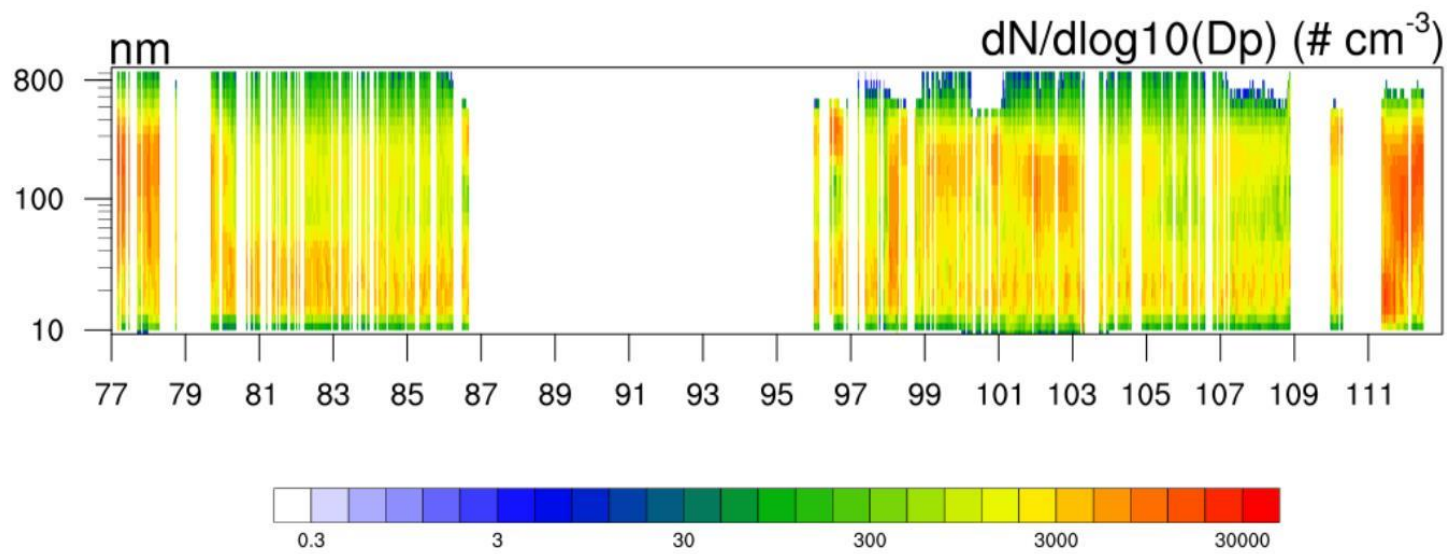

**Figure S6** Temporal variations of number size distribution of aerosol particles over NWPO during DOY 77-112.

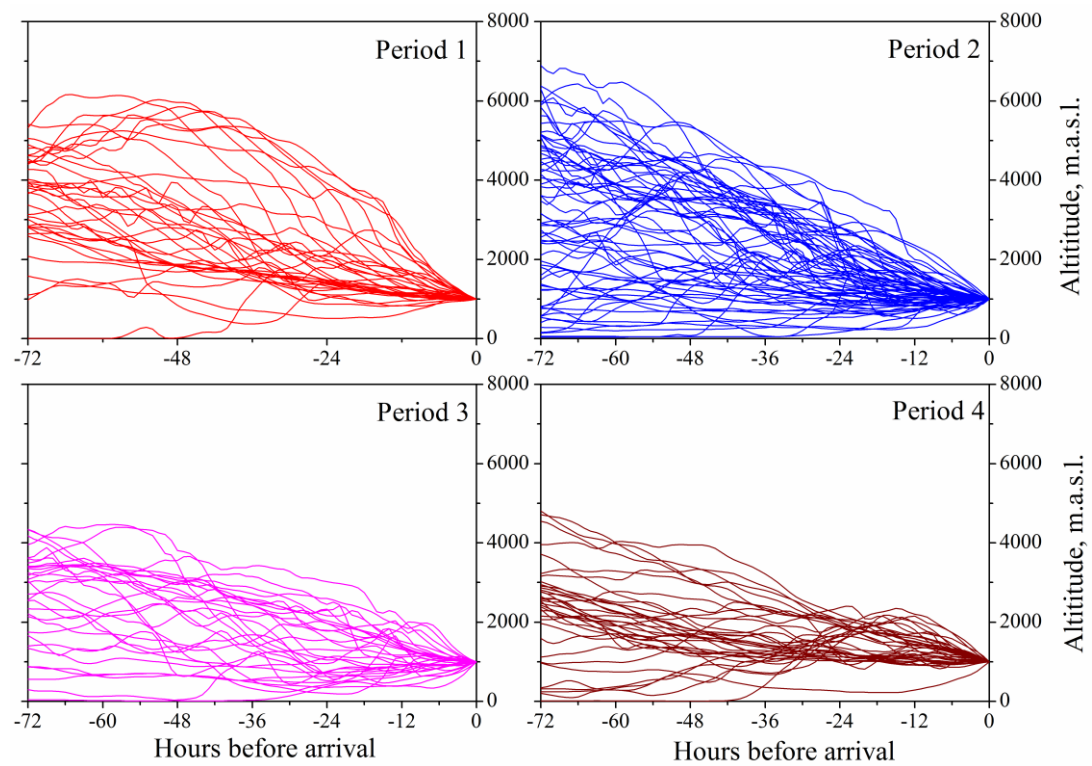

**Figure S7** Vertical backward air mass trajectory in different periods.



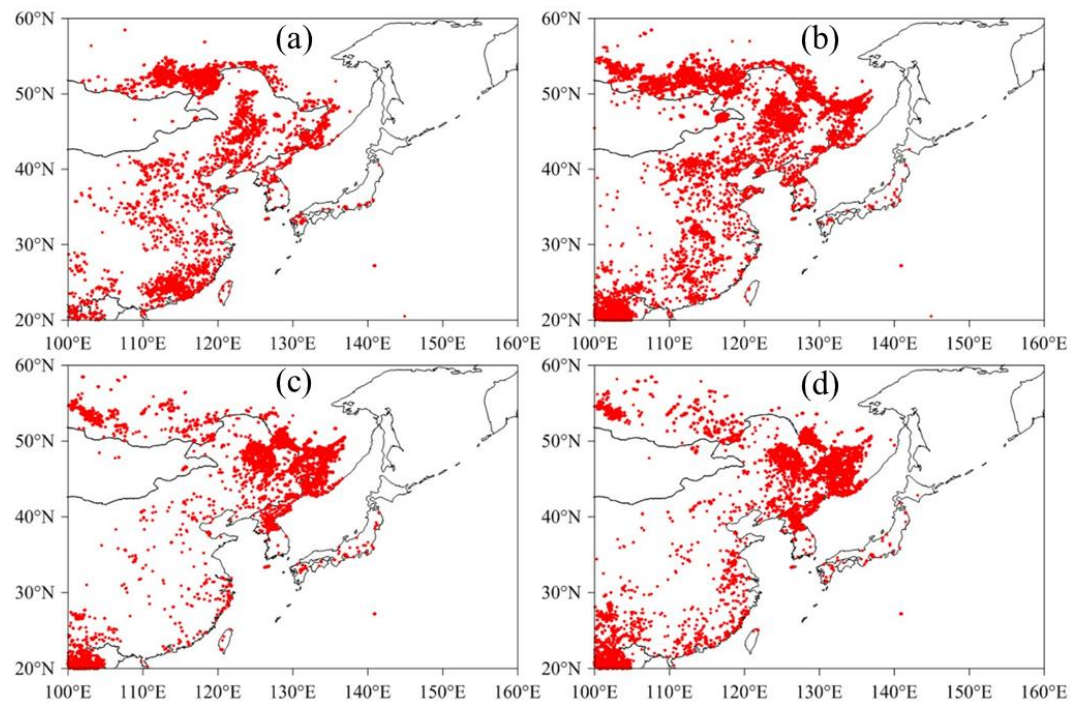

**Figure S8** Fire spots from FIRMS in East China, Siberia, and Russian Far East for Period 1 (a), Period 2 (b), Period 3 (c), and Period 4 (d).

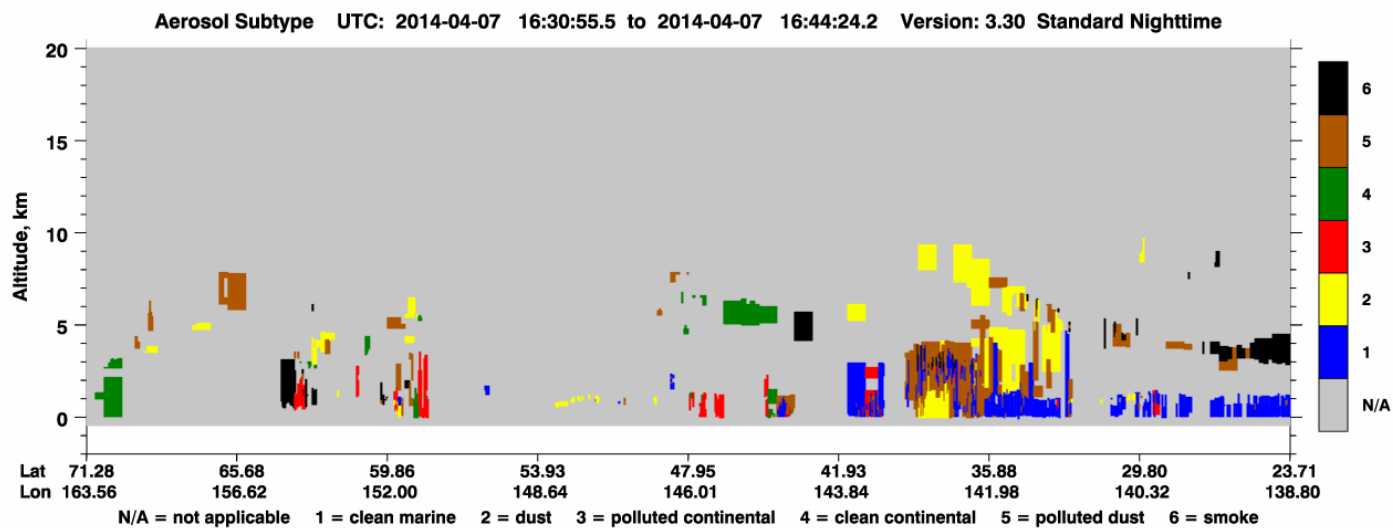

**Figure S9** Vertical profiles of the aerosol subtypes captured by CALIPSO during dust event.

**Table S1** Concentrations of CN and CCN and AR during DOY 77-80 and DOY 109-112, 2014.

| Sampling periods                 | DOY 77-80                            | DOY 109-112                | DOY 77-80 and DOY 109-112  |
|----------------------------------|--------------------------------------|----------------------------|----------------------------|
| CN( $\times 10^3$ ) <sup>a</sup> | 1.9-19.2, 5.2 $\pm$ 2.4 <sup>b</sup> | 2.4-13.4, 7.2 $\pm$ 3.1    | 1.9-19.2, 5.8 $\pm$ 2.8    |
| CCN( $\times 10^3$ ), SS =0.2%   | 0.23-4.2, 1.5 $\pm$ 1.0              | 0.64-4.0, 2.1 $\pm$ 0.99   | 0.23-4.2, 1.7 $\pm$ 1.0    |
| CCN( $\times 10^3$ ), SS =0.4%   | 0.34-7.5, 2.7 $\pm$ 1.9              | 1.1-7.5, 4.2 $\pm$ 2.0     | 0.34-7.5, 3.3 $\pm$ 2.0    |
| AR, 0.2%SS                       | 0.07-0.53, 0.29 $\pm$ 0.11           | 0.21-0.53, 0.32 $\pm$ 0.06 | 0.07-0.53, 0.30 $\pm$ 0.09 |
| AR, 0.4%SS                       | 0.11-0.92, 0.50 $\pm$ 0.19           | 0.29-0.88, 0.61 $\pm$ 0.13 | 0.11-0.92, 0.53 $\pm$ 0.18 |

<sup>a</sup> Unit the  $\times 10^3\text{cm}^{-3}$ <sup>b</sup> Range and mean  $\pm$  standard deviation
